# Supplementary material
Source: MDPI journal article supplement (https://www.mdpi.com/2079-6412/13/7/1269)
Supplement: s1 [file s1]

## Article

# Supplementary Materials: Heterostructures Based on Noble Metal Films with Ag and Au Nanoparticles: Fabrication, Study of In Vivo Biocompatibility and Antibacterial Activity

Svetlana I. Dorovskikh <sup>1,\*</sup>, Evgeniia S. Vikulova <sup>1</sup>, David S. Sergeevichev <sup>2</sup>, Tatiana Ya. Guselnikova <sup>1</sup>, Ilya V. Korolkov <sup>1</sup>, Anastasiya D. Fedorenko <sup>1</sup>, Dmitriy A. Nasimov <sup>3</sup>, Maria B. Vasilieva <sup>2,4</sup>, Elena V. Chepeleva <sup>2</sup>, Kseniya V. Zherikova <sup>1</sup>, Tamara V. Basova <sup>1</sup> and Natalya B. Morozova <sup>1,\*</sup>

- <sup>1</sup> Nikolaev Institute of Inorganic Chemistry Siberian Branch of the Russian Academy of Sciences SB RAS, 3 Lavrentiev Ave., 630090 Novosibirsk, Russia; lazorevka@mail.ru (E.S.V.); guselnikova@niic.nsc.ru (T.Y.G.); korolkov@niic.nsc.ru (I.V.K.); fedorenko@niic.nsc.ru (A.D.F.); ksenia@niic.nsc.ru (K.V.Z.); basova@niic.nsc.ru (T.V.B.)
  - <sup>2</sup> «E. Meshalkin National Medical Research Center» of the Ministry of Health of the Russian Federation, 15 Rechkunovskaya Str., 630055 Novosibirsk, Russia; d\_sergeevichev@meshalkin.ru (D.S.S.); vasilievam@yandex.ru (M.B.V.); amareza@mail.ru (E.V.C.)
  - <sup>3</sup> Rzhannov Institute of Semiconductor Physics SB RAS, 13 Lavrentiev Ave., 630090 Novosibirsk, Russia; nasimov@isp.nsc.ru
  - <sup>4</sup> V. Zelman's Institute of Medicine and Psychology, Novosibirsk State University, 1, Pirogov Str., 630090 Novosibirsk, Russia
- \* Correspondence: reter16@yandex.ru (S.I.D.); mor@niic.nsc.ru (N.B.M.); Tel.: +7-(383)3309556 (S.I.D.)

**Citation:** Dorovskikh, S.I.; Vikulova, E.S.; Sergeevichev, D.S.; Guselnikova, T.Y.; Korolkov, I.V.; Fedorenko, A.D.; Nasimov, D.A.; Vasilieva, M.B.; Chepeleva, E.V.; Zherikova, K.V.; et al. Heterostructures Based on Noble Metal Films with Ag and Au Nanoparticles: Fabrication, Study of In Vivo Biocompatibility and Antibacterial Activity. *Coatings* **2023**, *13*, 1269. <https://doi.org/10.3390/coatings13071269>

Academic Editor: Seunghan Oh

Received: 29 June 2023

Revised: 14 July 2023

Accepted: 17 July 2023

Published: 19 July 2023

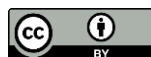

**Copyright:** © 2023 by the authors. Submitted for possible open access publication under the terms and conditions of the Creative Commons Attribution (CC BY) license (<https://creativecommons.org/licenses/by/4.0/>).

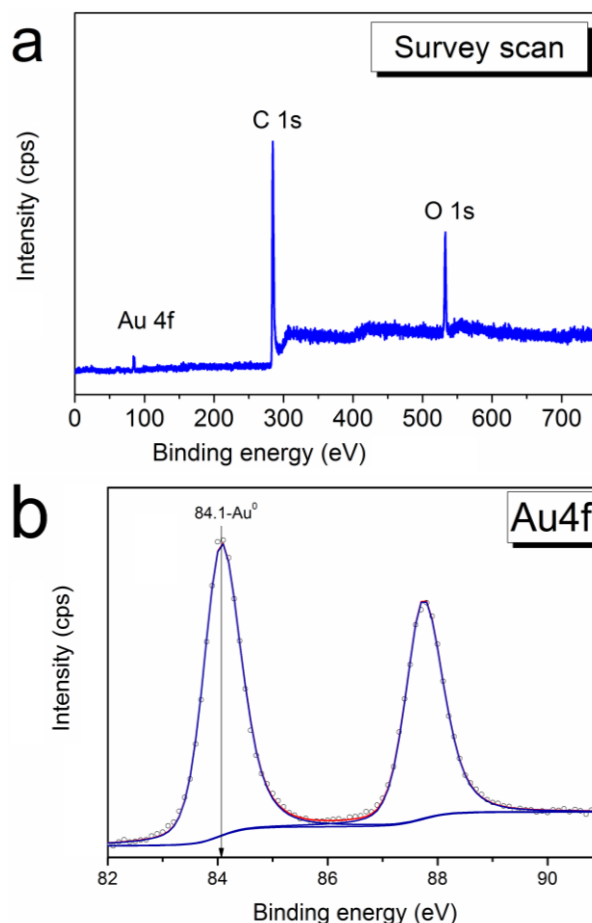

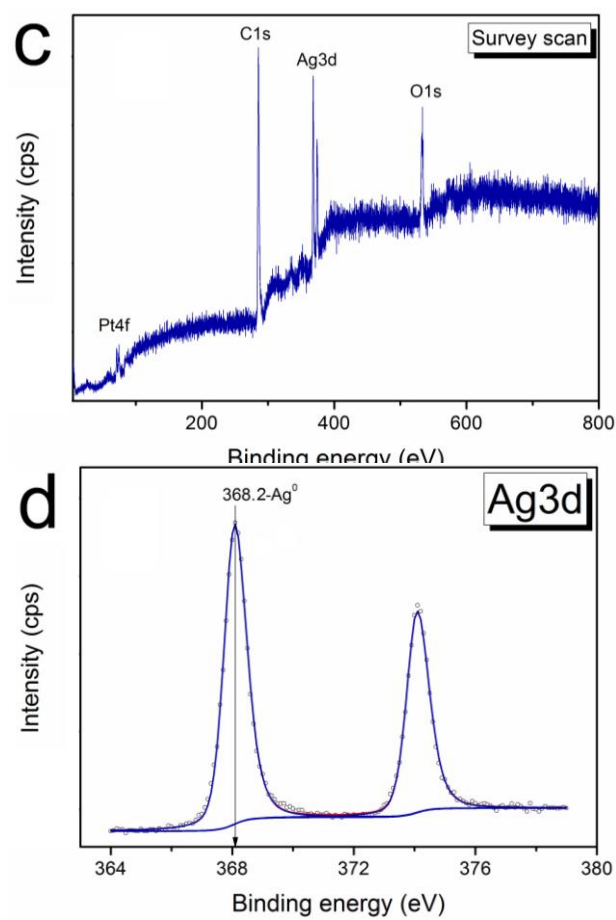

**Figure S1.** Survey XPS spectra of s-Au/CFR-PEEK (a) and Au 4f spectra (b), XPS spectra of s-Ag/Pt/CFR-PEEK (c) and Ag 3d spectra (d);.

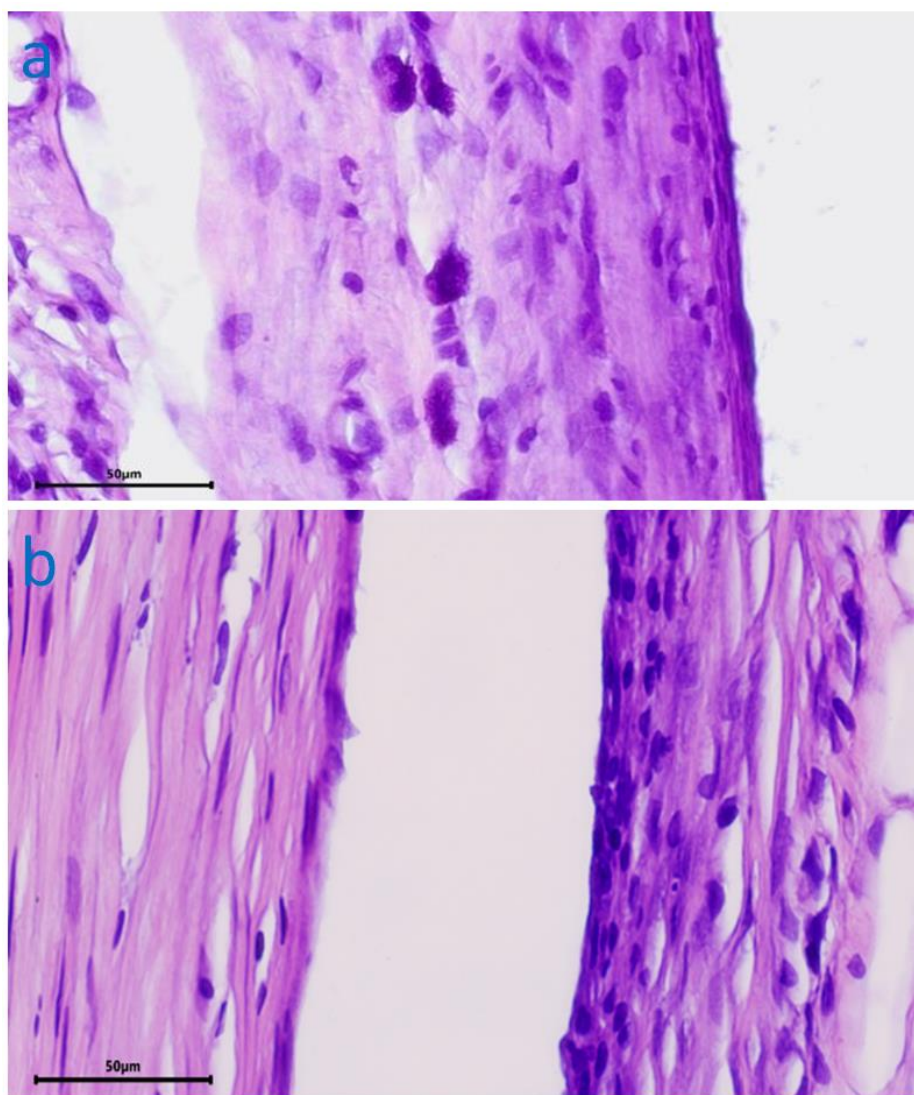

**Figure S2.** The microscopy images of capsule walls structure of s-Ag/Pt/CFR-PEEK samples after 1 month (a), and 3 months (b) of subcutaneous implantation.

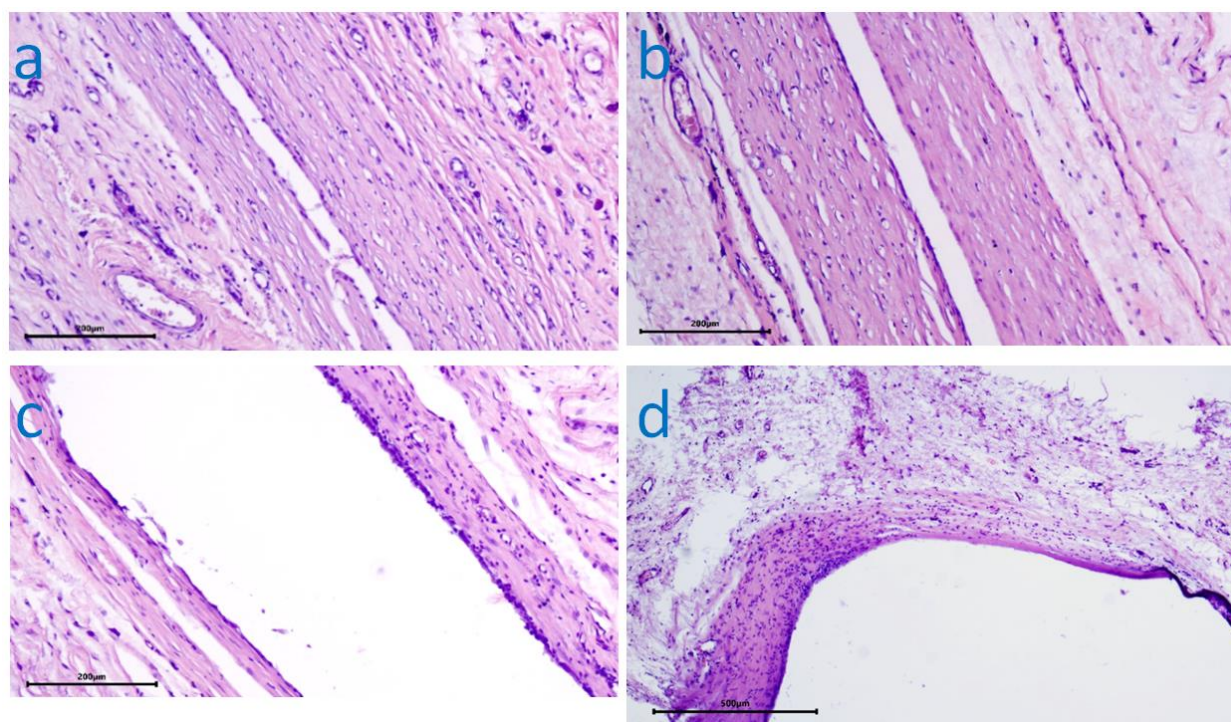

**Figure S3.** The microscopy images of capsule walls structure of implant samples after 1 month (s-Ag/Ir/CFR-PEEK—(a), b-Ag/Ir/CFR-PEEK—(c)), and 3 (s-Ag/Ir/CFR-PEEK—(b), b-Ag/Ir/CFR-PEEK—(d)) months of subcutaneous implantation.
